**Human pressures filter out the less resilient demographic strategies in natural  
populations of plants and animals worldwide**

A manuscript in preparation for submission to *Nature* as a research article

Thomas Merrien<sup>1,2,\*</sup>, Katrina Davis<sup>1</sup>, Moreno Di Marco<sup>3</sup>, Pol Capdevila<sup>1,4</sup>, & Roberto  
Salguero-Gómez<sup>1,5,\*</sup>

1 Department of Zoology, University of Oxford, 11a Mansfield Rd, OX1 3SZ, UK.

2 AgroParisTech, Université Paris-Saclay, 16 rue Claude Bernard, F-75231 Paris Cedex 05, France.

3 Department of Biology and Biotechnologies “Charles Darwin”, Sapienza University of Rome, Piazzale Aldo  
Moro 5, 00185 Roma, Italy.

4 School of Biological Sciences, Life Sciences Building, University of Bristol, 24 Tyndall Ave, Bristol BS8  
1TQ, UK.

5 Evolutionary Demography Laboratory, Max Planck Institute for Demographic Research, Konrad Zuse straÙe  
1, DE 18057, Germany.

\*Contact authors:

[thomas.merrien@agroparistech.fr](mailto:thomas.merrien@agroparistech.fr); +33 (0) 6 75 51 77 71

[rob.salguero@zoo.ox.ac.uk](mailto:rob.salguero@zoo.ox.ac.uk); +44 (0) 18 65 27 11 88

## Abstract

The exponential growth that has characterised human societies since the industrial revolution has fundamentally modified our surroundings. Examples include rapid increases in agricultural fields, now accounting for 37% of the land surface, as well as increases in urban areas, projected to triple worldwide by 2030. As such, understanding how species have adapted to and will respond to increasing human pressures is of key importance. Resilience, the ability of an ecological system to resist, recover, and even benefit from disturbances, is a key concept in this regard. Here, using a recently developed comparative demographic framework, we examine how the inherent ability of 921 natural populations of 279 plants and 45 animal species worldwide to respond to disturbances correlates with human settlement size and human activities. We develop a spatially and phylogenetically explicit model parameterised with life history traits and metrics of demographic resilience using the open-access COMPADRE and COMADRE databases, coupled with high-resolution human impact information via the Human Footprint database. We expected: (H1) species' populations located nearer urban areas to have a greater ability to resist, recover, or benefit from human-related disturbances compared to pristine habitats; (H2) human effects on the responses of animal populations to disturbances to depend on the species' ability for long-distance mobility; and (H3): human pressures to constrain the repertoire of life history strategies of animal and plant species via their effects on underlying vital rates and life history traits. We find that: (1) urban areas host a limited diversity of strategies that achieve demographic resilience with, on average, more resistant and faster-recovery populations located near human activities than in pristine habitats; (2) species with limited mobility tend to be more strongly affected by human activities than those with long-distance mobility; and (3) human pressures correlate with a limited set of vital rates and life history traits, including the ability to shrink, and reproduce earlier. Our results provide a

44 tangible picture of how, having drastically transformed terrestrial landscapes, humans have  
45 shaped the ways animals and plants respond to disturbances.

46 **Keywords:** amplification, comparative biology, life history trait, life history strategy,  
47 phylogenetic analysis, recovery, resistance.

48

49

The exponential growth that has characterised human societies since the industrial revolution has fundamentally modified our surroundings<sup>1-5</sup>. Examples include rapid increases in agricultural fields, now accounting for 37% of the land surface<sup>6</sup>. Similarly, urban areas are projected to triple by 2030<sup>7</sup>. Recently, 59% of the Earth's terrestrial surface has been estimated to be under direct, negative impacts by human land use<sup>8</sup>. Such human impacts are resulting in the rapid decrease of species' ranges<sup>9,10</sup>. Examples include the 80% projected decline of black spruce (*Abies nigra*) range in France<sup>11,12</sup>, or the forecasted 30% habitat loss for snow leopards (*Panthera unica*) in the Himalaya<sup>13</sup>, both by 2010. Ultimately, these fast reductions in species ranges affect the broad macroecological dynamics that regulate life on Earth<sup>14</sup>. Indeed, anthropogenic stressors on ecological systems are responsible for extinction rates comparable to those that caused the Big Five mass extinctions<sup>15,16</sup>. Of these stressors, human settlement size and human activities are strong predictors of species' geographic ranges<sup>17,18</sup>, as well as extinction rates in mammals<sup>19</sup>, birds<sup>20</sup>, and plants<sup>21</sup>.

The outcomes of human settlement size and activities on the viability of natural populations can be directly quantified using proxies of human impacts on the target species' demographic schedules. Changes in a natural population's vital rates (e.g., survival, development, reproduction, recruitment) will ultimately shape its success or failure, thus the presence/absence of a species at a given location and its overall range<sup>22-24</sup>. As such, demographic approaches provide us with powerful means to examine population responses to human disturbances<sup>25,26</sup>. Indeed, extensive evidence exists that disturbances shape species' life history strategies (*i.e.*, schedules of vital rates along a species' life cycle<sup>27</sup>), and that these strategies in turn determine the viability of natural populations<sup>28</sup>.

In recent decades, life history theory has developed frameworks to quantify and classify species responses to a/biotic disturbances using life history traits from across the Tree of Life. These life history traits, attributes that together describe life history strategies (e.g., generation

time, time at maturity, degree of parity), ultimately impact the performance of a population. Some examples of these frameworks include the r/K strategies<sup>29</sup>, the Competition-Stress Tolerator-Ruderal (CSR)<sup>30</sup>, the fast-slow continuum<sup>31</sup>, and the parity continuum<sup>32</sup>. The fast-slow continuum, in particular, classifies organisms according to a trade-off between allocation to survival *vs.* development. Short-lived, fast-growing species are located at one end of this continuum (e.g. the white trillium, *Trillium grandiflorum*; voles, *Microtus*<sup>32,33</sup>), while extremely long-lived, slow-growing species are found at the opposite end (e.g., the California redwood, *Sequoia sempervirens*; the African bush elephant, *Loxondota africana*<sup>32,33</sup>). The parity continuum, instead organises schedules of reproduction according to allocation into an offspring quality *vs.* quantity trade-off<sup>31,34</sup>, and between semelparous *vs.* iteroparous species<sup>32</sup>. Recent work classifying species along the fast-slow and parity continua has revealed that short-lived, semelparous species of plants and animals have the inherent ability to recover faster from natural disturbances<sup>35–37</sup>. Yet, which specific life history strategies are better poised to resist and recover from human impacts remains unknown.

Here, we examine how the ability of 921 natural populations of 279 plants and 45 animal species worldwide (Fig. S1) to respond to disturbances correlates with human settlement size and human activities. Specifically, we build a spatially and phylogenetically explicit model parameterised with life history traits and metrics of demographic resilience using the open-access COMPADRE<sup>38</sup> and COMADRE<sup>39</sup> databases, coupled with high-resolution human impact information via the Human Footprint database<sup>40</sup>. We expected: (H1) species' populations located nearer urban areas to have a greater ability to resist, recover, or even benefit from human-related disturbances compared to those living in more pristine habitats, assuming that the human pressures would have allowed these populations to adapt to frequent disturbance regimes and/or filter out the least resilient ones; (H2) human effects on the responses of animal populations to disturbances to depend on the species' ability for long-distance mobility, but for

these effects to be stronger in low-mobility animal, as their populations cannot flee away from human disturbances; and (H3): human pressures to constrain the repertoire of life history strategies of animal and plant species via their effects on underlying vital rates and life history traits. We find that (1) urban areas host a limited diversity of strategies that achieve demographic resilience with, on average, more resistant and faster-recovery populations located near human activities than in pristine habitats. Interestingly, this pattern also includes a decline in the ability of opportunist species to grow in population size after disturbances when their populations are located close to human settlements. This finding suggests that human urbanisation and land transformation have happened at a far-too-quick rate for resilient strategies to human impacts to have evolved; (2) species with limited mobility, tend to be more strongly affected by human activities than those with long-distance mobility; and (3) human pressures correlate with a limited set of vital rates and life history traits. For instance, individuals of populations located closer to human settlements tend to decrease in size more frequently (*i.e.*, shrinkage) and live faster (*i.e.*, reproduce earlier) than in pristine habitats. This finding is in agreement with recent research that has demonstrated that shrinkage and early maturation are key strategies to persist in suboptimal environments<sup>24,41</sup>.

## **Results**

Human impacts on terrestrial habitats are aligned along two independent axes: one of human activities and another one of land usage. To link the main kinds of human impacts and activities on terrestrial habitats to the life history traits and resilience of natural populations, we reduced the dimensionality of the eight components of the Human Footprint<sup>40</sup> using a Principal Component Analysis (PCA). This analysis reveals two dominant axes of variation in human activities, which together explain 53% of the variance (Fig. 1). The first axis, which absorbs 35.86% of this variance, informs on human presence, as it mainly separates areas according to human population density, degree of built environment, and light pollution. The second axis,

absorbing 16.63%, describes land use, as it predominantly separates extensive pastures from intense agricultural croplands.

To quantify the resilience of the 921 natural populations of our 324 examined species, we adopted a novel framework that classifies populations' inherent abilities to respond to disturbances using transient (*i.e.*, short-term) dynamics<sup>42</sup>. According to this framework, a population's intrinsic resilience can be quantified as per its resistance, speed of recovery, and compensation to shocks (*i.e.* sudden increase in population size after a disturbance)<sup>43</sup>. Next, we predicted these three dimensions of demographic resilience using the two principal component axes of human activities described above via (i) a spatially and phylogenetically explicit model, and also (ii) linear models. The former models allowed us to explicitly consider spatial and phylogenetic autocorrelations, while also estimating the role of phylogenetic inertia in our observed patterns. Our proxy to phylogenetic inertia, Pagel's  $\lambda$ <sup>44</sup>, was relatively high with the resistance metrics both for plant ( $\lambda = 0.958$ ,  $P < 0.001$ ) and animals ( $\lambda = 0.936$ ,  $P < 0.001$ ). It was also high for the two other components of demographic resilience (see Table S4).

The demographic resilience of plant and animal populations differ in their association with human activities. Our analyses reveal that animal populations tend to be more resistant ( $t$ -test<sub>df=107</sub> = 2.357,  $P = 0.020$ ) (Fig. 2a; Table S5) than plants when found closer to humans ( $t$ -test<sub>df=788</sub> = 1.508,  $P = 0.132$ ). On the contrary, animal populations exhibit a lower resistance in intense agricultural areas ( $t_{107}$  = -3.872,  $P < 0.001$ ), while plant population resistance is not affected by agricultural land use. The speed of recovery to disturbances in plant populations located near human presence is greater than in pristine habitats ( $t_{788}$  = 2.976,  $P = 0.003$ ). While the speed of recovery of animal populations is faster than plants ( $t_{112.46}$  = 4.35,  $P < 0.001$ ), this demographic resilience component is independent of proximity to human presence for animals. Interestingly, according to phylogenetically informed models, resistance decreases for plant populations closer to human areas ( $P_{MCMC} < 0.010$ ) but it increases for animal closer to humans

( $P_{MCMC} = 0.030$ ) and to intensely cultivated areas ( $P_{MCMC} = 0.010$ ). Regarding the ability of populations to increase in size after a disturbance, plants tend to lose compensation potential close to human presence ( $P_{MCMC} = 0.010$ , Fig. 2e), but their compensation remains unaffected by agricultural land use (Fig. 2f). The compensation of animals is not affected by either axis of human activities (Fig. 2e-f).

To test holistically how human presence affects the full demographic resilience portfolio of different species, we used convex hulls<sup>45</sup>. The volume defined by resistance and speed of recovery becomes thinner at higher values of human presence (Fig. 3a). This finding suggests a loss of diversity of the resistance/speed to recovery space in highly urban areas. Along the human presence axis, populations of animals and plants that are closer to human settlements are significantly more resistant ( $t_{913} = 2.098$ ,  $P = 0.036$ , Fig. 2a) and borderline faster at recovering from disturbances ( $t_{913} = 1.597$ ,  $P = 0.111$ , Fig. 2c), while their ability to increase in size after a disturbance is unaffected ( $t_{913} = -1.342$ ,  $P = 0.180$ , Fig. 2e). These results are not in opposition with our previous finding that highly resilient species are not found in highly populated areas; rather they suggest that human presence might not only affect the mean resilience values near human activities but also constrain their variance. This process would then lead to the homogenisation of the resilience dynamics of urban populations.

Simulations of resilience components using convex hulls demonstrate that our reported findings above are indeed linked to human presence. The resulting four-dimensional framework –of which we here show the dimensions of resistance, speed of recovery, and human presence axis for display restrictions (Fig. 3a)– is significantly different from a normal, uniform, or gamma distributions (Fig. 3b). Indeed, the volume occupied by the quantified resistance, speed of recovery, and compensation of our 921 populations as a function of their proximity to human settlements is smaller than that expected under a uniform (observed volume  $\approx 0.20$  simulated volume, Monte Carlo test with  $P < 0.050$ ), gamma (observed volume  $\approx$  simulated volume,  $P <$



0.050) or normal distributions of traits ( $P < 0.050$ ). Even when the volume is similar, the space occupied by our data's convex hull differs from the one occupied by the data simulated under the other three kinds of distributions, further emphasising that we are not in a situation where the populations are not affected by the human presence and might have been distributed along this axis uniformly or a situation where a central value would have been preferred. In other words, human presence matter in the distribution of resilience strategies. Overall, this finding suggests that the resilience space of our 921 natural populations of animals and plants may have been eroded by human activities. It is also worth noting that certain combinations of resistance-recovery strategies do not exist (or were not sampled) in our data. Examples include populations with low resistance but high recovery in pristine habitats.

The ability to flee from areas with human activities is a key driver of the demographic resilience of animals to human pressures. To test our second hypothesis (H2), that the ability to flee from stress will shape human activities ~ resilience relationships, we re-examined the spatially and phylogenetically explicit models above, this time comparing species with high mobility (*i.e.*, individuals move  $> 100$  Km in their ranges, *e.g.*, *Bonasa umbellus* (ruffed grouse), *Falco naumanni* (lesser kestrel)) *vs.* those with low mobility ( $< 100$  km; *e.g.*, *Emydura macquarii* (Macquarie turtle)). Animal species with both strategies, high *vs.* low mobility, gain resistance closer to human presence ( $t_{34} = 2.510$ ,  $P = 0.017$ ;  $t_{71} = 1.954$ ,  $P = 0.055$ ; respectively), but this enhanced resistance is more pronounced for low mobility species (Fig. 4a). Along the axis of agricultural land use, both groups show a decrease in resistance in intense agricultural lands, though this decline is sharper for high ( $t_{71} = -2.362$ ,  $P = 0.021$ ) than for low mobility species ( $t_{34} = -4.964$ ,  $P < 0.001$ ; Fig. 4b). However, when taking into account spatial and phylogenetic relationships, the populations of low mobility animal species are more resistant along the axis of agricultural land use ( $P_{MCMC} = 0.040$ ) and that the resistance of both high and low mobility species is independent of human presence. For the speed of recovery and

compensation, only low mobility species respond –and only mildly so– by recovering faster ( $t_{34} = 1.916$ ,  $P = 0.064$ , Fig. 4c) and compensating more ( $t_{34} = 1.971$ ,  $P = 0.057$ , Fig. 4e) the closer they are to human presence, and by compensating more ( $t_{34} = -2.374$ ,  $P = 0.023$ , Fig. 4f) and being more resistant ( $t_{34} = -4.694$ ,  $P < 0.001$ , Fig. 4b) when closer to agriculturally intensive areas. However, under our spatially and phylogenetically explicit model, the speed of recovery and compensation appear to not be affected by the two axes of human pressure in neither of the two groups of animal species (Table S5-6).

Human pressure effects of species demographic resilience are modulated via their impacts on only a limited set of vital rates and life history traits. To test hypothesis H3, that human pressures will correlate with changes in underlying vital rates and life history strategies, we developed a spatially and phylogenetically explicit model that accounts for adult body mass (for animals) or maximum height (for plants), separately (See Methods and Supplementary Online Materials). Surprisingly, the vital rates structuring our populations are not significantly affected by the effects of human presence, agricultural land use, nor their interaction (Table 1a). A notable exception is the ability of plants to shrink from one year to the next, which is positively correlated with both axes of human activities. In our pool of plant species, individuals in populations closer to human-transformed habitats tend to shrink more than those in pristine habitats. This finding is in agreement with studies that have shown that plant shrinkage increases chances of survival<sup>46</sup>, likely through the cut down in respiratory demands<sup>47</sup>, and a recent work showing that plant populations persist in unsuitable environments thanks to their ability to shrink<sup>24</sup>. Indeed, plant populations closer to human presence have slightly higher survival rates than in pristine habitats. Similarly, life history traits linked to reproduction are not affected by human pressures (Table 1b). Most life history traits do not respond to human pressures, except for generation time in animals, which tends towards a slight increase closer to human settlements (Table 1b). Further analyses, where animal species are separated based

on their high vs. low mobility, show that generation time is significantly longer in animal populations with high mobility that are primarily located closer to both human presence or in more intense agricultural lands ( $P_{MCMC} < 0.050$ ), while this life history trait is not affected in low-mobility animal species (see Table S5-6). However, amongst low mobility animals, age at first reproduction decreases significantly when their populations are located close to human presence and intensive agriculture ( $P_{MCMC} < 0.050$ ).

## **Discussion**

Using a novel framework that quantifies and compares components of demographic resilience across vastly different species<sup>43</sup>, we show how human presence and human activities have shaped –and especially constrained– the repertoire of demographic resilience strategies across 921 populations from 326 animal and plant species worldwide. Our findings also highlight how species that lack the ability for long-distance mobility/migration are more deeply impacted by human activities. The employed demographic resilience framework illustrates how human pressure affects a key aspect of demography: a populations ability to resist, recover, and even, in some cases, grow after a disturbance. Our convex hulls show a clear thinning of the resilience hypervolume of natural populations in urban habitats compared to pristine ecosystems. Closer to human settlements and intense agricultural areas, we report species with greater degrees of resistance and recovery time, but a narrow range of resilience. This finding in highly anthropised areas supports the hypothesis of abiotic homogenisation of resilience traits with intense human pressures<sup>48,49</sup>. Together, our findings suggest that human activities have filtered out less resilience species.

Species with a low potential of demographic resilience are found in pristine habitats, but not in urban places. This finding suggests that low-resilience species cannot persist in

human environments characterized by intense, frequent disturbances. An alternative explanation for this pattern is that low-resilience species might not have been present in areas where humans have settled and transformed the land. Indeed, humans have mostly settled in places with a high primary production and relatively stable climates<sup>50</sup>. However, these locations, by offering conditions that are not too extreme and relatively stable hence, should have selected for species with adaptations to disturbances. Indeed, resilience strategies to disturbances often come at a cost to organisms, which thus can be too expensive to persist in environments where they are not that frequently used<sup>51</sup>. Consequently, maintaining some resistance aspect would be done at the expense of some other functions, leading to a reduced competitive ability in stable environments<sup>52</sup>. Furthermore, here we have worked only under the prism of the outcomes of human activities and infrastructures. It is possible that key social aspects of human societies as well as natural disturbance, not examined here, may have differentially selected for the resilience abilities of natural populations worldwide. Finally, on top of the side-effects of anthropisation, humans are known to actively select and facilitate species around them that best fit their needs, potentially regardless of resilience properties.

Our work highlights the importance of studying short-term metrics in disturbance ecology and ecology at large. Our resilience framework uses short-term (*i.e.*, transient) demographic metrics<sup>43,53–55</sup> that we here show are rather responsive to human disturbances. These metrics are, currently, not frequently used in demography<sup>43</sup>, despite the fact that evidence exists that short-term dynamics account for at least 50% of demographic variability in natural populations, compared to other, more frequently used, long-term metrics<sup>56</sup>. Nonetheless, the usage of these transient metrics is not free of risks. Indeed, the transient dynamic, and hence our resilience metrics, are estimated from components of stage-structured population models such as eigenvectors and eigenvalues, and these ultimately are shaped by the population's vital rates<sup>43,55</sup>. Thus, these metrics speak to the inherent *potential* for resilience of a population. The

realised resilience is naturally best examined through experimental manipulations of disturbance regimes, an area of ecology that is currently lacking at the macro-ecological level, with notable exceptions such as DRAGNet, NutNet, and PlantPopNet.

Human pressure effects on vital rates and life history traits were for the most part indistinguishable in our study. Though the few traits significantly affected by human activities strengthened our hypothesis of a modulation of the demographic properties of species by human activities via underlying demographic processes, these occurred primarily through the ability of plants to shrink, and animals to accelerate their age at maturity near human settlements. Indeed, shrinkage increases the chances of survival either through saving on respiratory demands<sup>46</sup> and/or because it allows population to persist in disturbed and unsuitable environments waiting for better conditions to start growing again<sup>47</sup>. Shorter times to reproduction can also enable populations to adapt better to changing environments as it permits in certain conditions a higher number of mutants that can be adapted to this disturbed environments<sup>57,58</sup>. Moreover, and despite the lack of evidence of outcomes of human activities on reproductive rates in our study, other studies showing the effect of urbanization on the reproductive success and thereby demography of birds<sup>59-61</sup> does exist. This fact enlightens the need of combining both macroecological studies such as the present work, with long term monitoring and experiment-based research projects to better reflect and understand the ecological and evolutionary responses of species to disturbances.

We used model's residuals to control both for spatial and phylogenetic autocorrelation. To assess the reliability of our method, we ran separated phylogenetically and spatially controlled regression and compared the results of the different methods. Indeed, using residuals in further analyses to correct for the body mass or other parameters that bias the model is an common method in ecology<sup>62</sup>. However, this method does have certain limitations<sup>63,64</sup>; namely, it can provides biased estimates and it can increase the sensitivity of the significance of

variables. Our results, using both residuals regression and separated regressions, showed similar results (see Supplementary Online Materials, Table S7-12). Hence, our method appears robust and reliable. Developing models that incorporate multiple corrections still remains a key challenge in macroecology<sup>65</sup>. Moreover, despite the value of the data contained in COMPADRE and COMADRE databases, geographic and taxonomic biases exist in them<sup>66</sup> (Figure S1), which could have affected our global description of the human correlates of population resilience. For instance, the representativeness of our sample size is rather low, with 279 species of plants representing *circa* 0.1% of all extant plants, and 45 species of animals <0.003% within kingdom Animalia.

Future steps should include the role of density dependence in population resilience in an explicit manner. Here, density dependence is only implicitly considered due to the lack of global demographic data with explicit estimates of density effects. Specifically, in our study, each of the carefully selected stage-structured population models are long-term means over the period of sampling in each peer-reviewed published study, where the population have likely been internally regulated through intra-specific competition. Tucker et al.<sup>67</sup> recently showed a link between mammal population density and human footprint index. Extending their hypothesis to a greater range of classes and studying the link between life history traits, human pressure, and population density will likely provide a better understanding of the situation and of the mechanisms that underpin these relationships and their relationship to population resilience. Similarly, including differential climate effects on species demography across the broad range of ecoregions we have examined here will be a valuable step forward, particularly since both plants and mammals from the same databases we use here have recently been reported to respond strongly climate extremes<sup>68,69</sup>.

The correlates of human activities with different dimensions of population resilience show a different directionality between plants and animals, and even between animals

depending in their ability for long-distance mobility/migration. Indeed, the outcomes of human activities vary with the state of the environment and the populations. But, still, the significance of an effect of human pressure, especially human presence, on the resilience of species is confirmed in our analyses. Finally, we found a strong biotic homogenisation of the resilience strategies along an axis of human presence. This can be linked to multiple factors but remains an important concern for conservation policies.

## **Material and Methods**

### *Resilience framework*

To understand how human presence shape the resilience strategies of species, we examined the volume occupied by our populations in a space defined by their resistance, speed of recovery, compensation, and human pressure. We used the method described in Diaz et al.<sup>70</sup>. Briefly, this approach consist on quantifying convex hulls based on the empirical distribution of the resistance, recovery time, and compensation of our populations, compared to null model where these traits are (1) uniformly distributed between the maximum and the minimum values of the observations, (2) normally distributed with the mean and the variance of the normal distribution being equal to respectively the mean and the variance of the observations, (3) gamma distributed along the axis of human presence. To model the gamma distribution, we used the following parameters:

$$\begin{cases} k = \frac{\bar{x}^2}{S^2} \\ \theta = \frac{S^2}{\bar{x}} \end{cases}$$

with  $k$  being the shape and  $\vartheta$  the scale of the gamma distribution,  $\bar{x}$  the mean of the observed data and  $S^2$  the variance of the observed data.

346

347 *Data provenance and selection*

348       To quantify human pressure, we used the Human Footprint (HFP)<sup>40</sup>. Importantly,  
349 because the HFP is composed of eight layers that cover all terrestrial surface of the globe,  
350 excluding Antarctic, at a 1km<sup>2</sup> resolution, this resource allows us to determine at a high spatial  
351 resolution not only the overall effects of humans on the demographic resilience and life history  
352 traits of natural populations, but also their underlying putative causes) (e.g., density of built  
353 infrastructures, proximity to railways). The HFP assigns score of 50 based on multiple human  
354 activities on the environment at each pixel. These layers of activity include human population  
355 density, roads, navigable waterways, railways, night-time lights, built environment which is the  
356 density of buildings and paved land estimated through satellites images analyses, pasture lands,  
357 croplands (Fig. 1). Two sets of maps are available in the HFP, for 1993 and 2009. These two  
358 years allow for a more comprehensive fit between the demographic data used here (below) and  
359 the human pressure at the time of the record. Specifically, we matched the HFP scores of each  
360 layer where demographic data was available to the year that was closest to when the  
361 demographic data were collected.

362       To assign each of our studied natural populations a score of human-pressure, while  
363 recognising the heterogeneity and potentially different effects of human activities, we used  
364 multivariate analyses. We first performed a principal component analysis (PCA) on all eight  
365 HFP layers. To do so, we rescaled the HFP map at a 10 × 10 km<sup>2</sup> resolution, sub-sampling just  
366 one pixel in each grid cell. Next, we extracted 60,000 random data points from the 10 km<sup>2</sup> map  
367 and used that subset of data to run the PCA analysis. Because the HFP data were linked to the  
368 1993 or the 2009 HFP version, we ran a sensitivity analysis of the PCA outputs to compare the  
369 results coming only from the 1993 map, from the 2009 map or from a mix of both. As the results



were quite similar (not shown), we took a subset of 60,000 random but unique points distributed around the map and the two HFP dates.

To obtain data on species demography, we used the COMPADRE Plant Matrix Database v.5.0.0<sup>38</sup> and the COMADRE Animal Matrix Database v.3.0.0<sup>39</sup>. These databases contain 9,121 matrix population models (MPMs) of 760 plant species (Appendix 1), and 2,277 MPMs of 446 animal species, respectively (Appendix 1). MPMs are discrete-time structured population models in which individuals are classified into discrete stages<sup>71</sup>. We then calculated transient dynamics values that relate to key resilience quantities<sup>43</sup>, vital rates<sup>71</sup>, and life history traits<sup>32</sup> for a mean MPM that summarises the dynamics of each of our 921 populations (See supplementary material for more details about the demographic features obtention) (See Appendix 2 for the list of demographic traits).

To check the robustness and validity of our comparative analyses, we assessed the validity of our demographic data. We cleaned our dataset by removing suspect data and missing values. We retained only terrestrial populations that had a full coverage of HFP data, a population growth rate ( $\lambda$ ) < 3 (we considered values above 3 as suspect for plant and animal populations, as that would indicate too fast a growth for a natural population). We also removed MPMs from populations that were subject to manipulations, and consequently MPMs that were not estimated from natural conditions. Finally, we only kept the MPMs that were ergodic, primitive, and irreducible to respect the Perron-Frobenius theorem requirements to calculate growth-rate and some other matrix properties as well as to be sure that each MPM represented a complete life cycle<sup>72,73</sup>. At the level of population projection, an ergodic matrix ensures the user to obtain the same stable asymptotic growth rate regardless of initial population structure<sup>54</sup>. An irreducible matrix ensures that there will always be a pathway (direct or indirect) from one stage or age class to another. Primitive matrices are ergodic, irreducible and aperiodic which means that the greater common divisor of the life cycle lengths is 1<sup>74</sup>.

To reduce the number of traits to analyse, we removed those that were correlated. We examined the pairwise correlation between all the traits using the pearson correlation tests through the cor() function in R version 4.0.1<sup>75</sup>. To decide whether traits were correlated or not, we applied an arbitrary threshold value of 0.6. Therefore, when two traits had an absolute value of the coefficient of correlation superior to 0.6, they were considered correlated and we removed one of them, except in the case of the life-history traits that were all kept for future prospects.

#### *Demographic traits regression*

We developed two models to study the interaction between human activities through the PCA main dimensions and species' demographic resilience components. In both models, we controlled for trait variation due to the size of the individuals (*i.e.*, adult body mass for animals, maximum height for plants), spatial autocorrelation, the phylogenetic or evolutionary history autocorrelation, and the complexity of the life history that is estimated via the MPM dimension. Importantly here, it has been shown that life history traits scale with size in animals, especially in mammals<sup>76,77</sup>. Similarly, it has been shown that spatially close populations are more likely to be similar than distant populations than expected by pure chance<sup>78,79</sup>.

To quantify and explicitly consider the effect of potential phylogenetic co-variation in traits in our analyses, we constructed two phylogenetic trees resolved down to the population level, one for plants (see Online Appendix), and another one for animals (see Online Appendix). We used Timetree<sup>80</sup> to create an animal phylogeny to accommodate our 109 populations from 45 examined animal species, and the package V.phylomaker<sup>81</sup> to create a plant phylogeny to accommodate our 796 populations from 279 examined plant species. As some sources in COMPADRE and COMPADRE contain multiple populations per species, we created our phylogenies at the population level instead of a species level. To do so, each population from

the same species was separated by a small distance ( $\epsilon = 0.0000001$  normalized units), thus assuming that populations within a same species are very closely related. As the order of the population divergences within our phylogenetic analyses might have an impact on the measure of the phylogenetic signal and on the further correction, we ran sensitivity analysis of some phylogenetic signals using different trees with a random order of the populations within the tree. These sensitivity analyses showed no effect (not shown).

Our first model to test the effects of human pressure on demographic traits was based on the study of the residuals after removing the effects of the confounding effects: animal size/plant height, spatial autocorrelations, phylogenetic relationships. Technically, we incorporated correction for body mass and plant height (later called size) in our study when linearity was assessed in the relationship between the trait and the size. Next, we assessed the effect of spatial autocorrelation on our models by calculating the Moran's index associated to the different traits or to the residuals of the regression of the trait and size when a size effect was detected. If spatial autocorrelation was found, we incorporated a correction for the location in the model<sup>82</sup>. To do so, we used the tensor function of generalized additive models (gam) with longitude and latitude<sup>83,84</sup> using R-package mgcv version 1.8-28. Finally, we ran a Markov Chains Monte Carlo generalized linear mixed model (MCMCglmm) of the residuals of the traits corrected (or not) for size and spatial autocorrelation on the HFP PCA main dimensions and that consider the phylogeny of the populations.

Our second series of models to validate the new model developed are aimed to disentangle spatial and phylogenetic corrections. As working on residuals can be a bit controversial because one might neglect important pieces of information<sup>63,64</sup>, we ran models with similar parameters as previously described but without using residuals. In this case, we did not correct for both spatial and phylogenetic autocorrelations together, but we ran the two analyses separately. We included the size as an explicative parameter when it was relevant

(Fisher's exact test) and ran Markov Chains Monte Carlo generalized linear mixed model (MCMCglmm) to take evolutionary history into account and gam with longitude and latitude to take spatial distribution into account.

## **Acknowledgement**

We thank the members of the SalGo Team for their valuable comments, help in interpretation, and discussions. The authors acknowledge the support of the University of Oxford's Advanced Research Computing (ARC) facility in carrying out this work. <http://dx.doi.org/10.5281/zenodo.22558>. PC was supported by Ramón Areces fellowship hosted by RS-G. RS-G was supported by a NERC IRF (NE/M018458/1).

## **Literature**

1. Candelone, J.-P., Hong, S., Pellone, C. & Boutron, C. F. Post-Industrial Revolution changes in large-scale atmospheric pollution of the northern hemisphere by heavy metals as documented in central Greenland snow and ice. *J. Geophys. Res.* **100**, 16605 (1995).
2. Lucas, R. E. The industrial revolution : Past and Future. (1998).
3. Steffen, W. *et al.* The Anthropocene: From Global Change to Planetary Stewardship. *AMBIO* **40**, 739–761 (2011).
4. United Nations. *World Population Prospects 2019: Methodology of the United Nations population estimates and projections.* (2019b).
5. Vitousek, P. M., Mooney, H. A., Lubchenco, J. & Melillo, J. M. Human Domination of Earth's Ecosystems. **277**, 7 (1997).
6. Foley, J. A. Global Consequences of Land Use. *Science* **309**, 570–574 (2005).

- 467 7. Seto, K. C., Guneralp, B. & Hutyra, L. R. Global forecasts of urban expansion to 2030 and direct  
468 impacts on biodiversity and carbon pools. *Proc. Natl. Acad. Sci.* **109**, 16083–16088 (2012).
- 469 8. Hurtt, G. C. *et al.* Harmonization of global land use change and management for the period 850–  
470 2100 (LUH2) for CMIP6. *Geosci. Model Dev.* **13**, 5425–5464 (2020).
- 471 9. Urban, M. C. Accelerating extinction risk from climate change. *Science* **348**, 571–573 (2015).
- 472 10. Pacifici, M. *et al.* Global correlates of range contractions and expansions in terrestrial mammals.  
473 *Nat. Commun.* **11**, 2840 (2020).
- 474 11. Change, I. P. on C. *Climate Change 2013: The Physical Science Basis: Working Group I*  
475 *Contribution to the Fifth Assessment Report of the Intergovernmental Panel on Climate Change.*  
476 (Cambridge University Press, 2014).
- 477 12. Piedallu, C., Perez, V., Gégout, J.-C., Lebourgeois, F. & Bertrand, R. Potential impact of global  
478 warming on the range of Spruce, Fir, Beech and Sessile Oak in France. (2009).
- 479 13. Forrest, J. L. *et al.* Conservation and climate change: Assessing the vulnerability of snow leopard  
480 habitat to treeline shift in the Himalaya. *Biol. Conserv.* **150**, 129–135 (2012).
- 481 14. Yamaura, Y. *et al.* Does land-use change affect biodiversity dynamics at a macroecological scale?  
482 A case study of birds over the past 20 years in Japan. *Anim. Conserv.* **12**, 110–119 (2009).
- 483 15. Barnosky, A. D. *et al.* Has the Earth’s sixth mass extinction already arrived? *Nature* **471**, 51–57  
484 (2011).
- 485 16. Di Marco, M. *et al.* Projecting impacts of global climate and land-use scenarios on plant  
486 biodiversity using compositional-turnover modelling. *Glob. Change Biol.* **25**, 2763–2778 (2019).
- 487 17. Di Marco, M., Venter, O., Possingham, H. P. & Watson, J. E. M. Changes in human footprint drive  
488 changes in species extinction risk. *Nat. Commun.* **9**, 4621 (2018).
- 489 18. Di Marco, M. & Santini, L. Human pressures predict species’ geographic range size better than  
490 biological traits. *Glob. Change Biol.* **21**, 2169–2178 (2015).
- 491 19. Andermann, T., Faurby, S., Turvey, S. T., Antonelli, A. & Silvestro, D. The past and future human  
492 impact on mammalian diversity. *Sci. Adv.* **6**, eabb2313 (2020).

- 493 20. Chen, C. *et al.* Correlates of extinction risk in Chinese endemic birds. *Avian Res.* **10**, 8 (2019).
- 494 21. Darrah, S. E., Bland, L. M., Bachman, S. P., Clubbe, C. P. & Trias-Blasi, A. Using coarse-scale  
495 species distribution data to predict extinction risk in plants. *Divers. Distrib.* **23**, 435–447 (2017).
- 496 22. Willi, Y. & Hoffmann, A. A. Demographic factors and genetic variation influence population  
497 persistence under environmental change. *J. Evol. Biol.* **22**, 124–133 (2009).
- 498 23. Merow, C. *et al.* On using integral projection models to generate demographically driven  
499 predictions of species' distributions: development and validation using sparse data. *Ecography*  
500 **37**, 1167–1183 (2014).
- 501 24. Csörgő, A. M. *et al.* Less favourable climates constrain demographic strategies in plants. *Ecol.*  
502 *Lett.* **20**, 969–980 (2017).
- 503 25. Gamelon, M. *et al.* High Hunting Pressure Selects for Earlier Birth Date: Wild Boar as a Case  
504 Study. *Evolution* **65**, 3100–3112 (2011).
- 505 26. Moss, R. *et al.* Impacts of Human Disturbance on Capercaillie Tetrao urogallus Distribution and  
506 Demography in Scottish Woodland. *Wildl. Biol.* **20**, 1–18 (2014).
- 507 27. Loehle, C. Strategy Space and the Disturbance Spectrum: A Life-History Model for Tree Species  
508 Coexistence. *Am. Nat.* **156**, 14–33 (2000).
- 509 28. Fujiwara, M. Extinction-Effective Population Index: Incorporating Life-History Variations in  
510 Population Viability Analysis. *Ecology* **88**, 2345–2353 (2007).
- 511 29. MacArthur, R. H. & Wilson, E. O. *The Theory of Island Biogeography*. (Princeton University Press,  
512 2001).
- 513 30. Grime, J. P. Vegetation classification by reference to strategies. *Nature* **250**, 26–31 (1974).
- 514 31. Stearns, S. C. The Influence of Size and Phylogeny on Patterns of Covariation among Life-History  
515 Traits in the Mammals. *Oikos* **41**, 173–187 (1983).
- 516 32. Salguero-Gómez, R. *et al.* Fast–slow continuum and reproductive strategies structure plant life-  
517 history variation worldwide. *Proc. Natl. Acad. Sci.* **113**, 230–235 (2016).

518 33. Oli, M. K. The fast–slow continuum and mammalian life-history patterns: an empirical evaluation.  
519 *Basic Appl. Ecol.* **5**, 449–463 (2004).

520 34. Gaillard, J.-M. *et al.* An Analysis of Demographic Tactics in Birds and Mammals. *Oikos* **56**, 59–76  
521 (1989).

522 35. Blackburn, T. M. Evidence for a ‘Fast-Slow’ Continuum of Life-History Traits Among Parasitoid  
523 Hymenoptera. *Funct. Ecol.* **5**, 65–74 (1991).

524 36. Partridge, L. & Harvey, P. H. The Ecological Context of Life History Evolution. *Science* **241**, 1449–  
525 1455 (1988).

526 37. Salguero-Gómez, R. Applications of the fast–slow continuum and reproductive strategy  
527 framework of plant life histories. *New Phytol.* **213**, 1618–1624 (2017).

528 38. Salguero-Gómez, R. *et al.* The compadre Plant Matrix Database: an open online repository for  
529 plant demography. *J. Ecol.* **103**, 202–218 (2015).

530 39. Salguero-Gómez, R. *et al.* COMADRE: a global data base of animal demography. *J. Anim. Ecol.* **85**,  
531 371–384 (2016).

532 40. Venter, O. *et al.* Global terrestrial Human Footprint maps for 1993 and 2009. *Sci. Data* **3**, 160067  
533 (2016).

534 41. Polverino, G., Santostefano, F., Díaz-Gil, C. & Mehner, T. Ecological conditions drive pace-of-life  
535 syndromes by shaping relationships between life history, physiology and behaviour in two  
536 populations of Eastern mosquitofish. *Sci. Rep.* **8**, 14673 (2018).

537 42. Stott, I., Townley, S. & Hodgson, D. J. A framework for studying transient dynamics of population  
538 projection matrix models. *Ecol. Lett.* **14**, 959–970 (2011).

539 43. Capdevila, P., Stott, I., Beger, M. & Salguero-Gómez, R. Towards a Comparative Framework of  
540 Demographic Resilience. *Trends Ecol. Evol.* **35**, 776–786 (2020).

541 44. Freckleton, R. P., Harvey, P. H. & Pagel, M. Phylogenetic Analysis and Comparative Data: A Test  
542 and Review of Evidence. *Am. Nat.* **160**, 712–726 (2002).

543 45. Barber, C. B., Dobkin, D. P. & Huhdanpaa, H. The quickhull algorithm for convex hulls. *ACM Trans.*  
544 *Math. Softw.* **22**, 469–483 (1996).

545 46. Salguero-Gómez, R. & Casper, B. B. Keeping plant shrinkage in the demographic loop. *J. Ecol.* **98**,  
546 312–323 (2010).

547 47. Salguero-Gómez, R. & Casper, B. B. Introducing short roots in a desert perennial: anatomy and  
548 spatiotemporal foraging responses to increased precipitation. *New Phytol.* **191**, 173–183 (2011).

549 48. *Biotic Homogenization*. (Springer US, 2001). doi:10.1007/978-1-4615-1261-5.

550 49. McKinney, M. L. & Lockwood, J. L. Biotic homogenization: a few winners replacing many losers in  
551 the next mass extinction. *Trends Ecol. Evol.* **14**, 450–453 (1999).

552 50. Durand-Dastes, F. Densité de population et systèmes agricoles en Inde. 2.

553 51. Osier, T. L. & Lindroth, R. L. Genotype and environment determine allocation to and costs of  
554 resistance in quaking aspen. *Oecologia* **148**, 293–303 (2006).

555 52. Melnyk, A. H., Wong, A. & Kassen, R. The fitness costs of antibiotic resistance mutations. *Evol.*  
556 *Appl.* **8**, 273–283 (2015).

557 53. Hastings, A. Transient dynamics and persistence of ecological systems. *Ecol. Lett.* **4**, 215–220  
558 (2001).

559 54. Stott, I., Franco, M., Carslake, D., Townley, S. & Hodgson, D. Boom or bust? A comparative  
560 analysis of transient population dynamics in plants. *J. Ecol.* **98**, 302–311 (2010).

561 55. Neubert, M. G. & Caswell, H. Alternatives to Resilience for Measuring the Responses of  
562 Ecological Systems to Perturbations. *Ecology* **78**, 653–665 (1997).

563 56. McDonald, J. L., Stott, I., Townley, S. & Hodgson, D. J. Transients drive the demographic dynamics  
564 of plant populations in variable environments. *J. Ecol.* **104**, 306–314 (2016).

565 57. Callaghan, T. V. *et al.* Biodiversity, Distributions and Adaptations of Arctic Species in the Context  
566 of Environmental Change. *AMBIO J. Hum. Environ.* **33**, 404–417 (2004).



- 567 58. Gandon, S. & Michalakis, Y. Local adaptation, evolutionary potential and host–parasite  
568 coevolution: interactions between migration, mutation, population size and generation time. *J.*  
569 *Evol. Biol.* **15**, 451–462 (2002).
- 570 59. Brown, L. M. & Graham, C. H. Demography, traits and vulnerability to urbanization: can we make  
571 generalizations? *J. Appl. Ecol.* **52**, 1455–1464 (2015).
- 572 60. Chace, J. F. & Walsh, J. J. Urban effects on native avifauna: a review. *Landsc. Urban Plan.* **74**, 46–  
573 69 (2006).
- 574 61. Chamberlain, D. E. *et al.* Avian productivity in urban landscapes: a review and meta-analysis. *Ibis*  
575 **151**, 1–18 (2009).
- 576 62. Miles, D. B. & Dunham, A. E. Comparative Analyses of Phylogenetic Effects in the Life-History  
577 Patterns of Iguanid Reptiles. *Am. Nat.* **139**, 848–869 (1992).
- 578 63. Freckleton, R. P. On the misuse of residuals in ecology: regression of residuals vs. multiple  
579 regression. *J. Anim. Ecol.* **71**, 542–545 (2002).
- 580 64. Chen, W., Hribar, P. & Melessa, S. Incorrect Inferences When Using Residuals as Dependent  
581 Variables. *J. Account. Res.* **56**, 751–796 (2018).
- 582 65. Kühn, I., Nobis, M. P. & Durka, W. Combining spatial and phylogenetic eigenvector filtering in  
583 trait analysis. *Glob. Ecol. Biogeogr.* **18**, 745–758 (2009).
- 584 66. Römer, G., Dahlgren, J. P., Salguero-Gómez, R., Stott, I. M. & Jones, O. R. *Plant demographic*  
585 *knowledge is biased towards short-term studies of temperate-region herbaceous perennials.*  
586 2021.04.25.441327 <https://www.biorxiv.org/content/10.1101/2021.04.25.441327v1> (2021)  
587 doi:10.1101/2021.04.25.441327.
- 588 67. Tucker, M. A., Santini, L., Carbone, C. & Mueller, T. Mammal population densities at a global  
589 scale are higher in human-modified areas. *Ecography* **44**, 1–13 (2021).
- 590 68. Compagnoni, A. *et al.* Short-lived plants have stronger demographic responses to climate.  
591 *bioRxiv* 2020.06.18.160135 (2020) doi:10.1101/2020.06.18.160135.

592 69. Paniw, M., Maag, N., Cozzi, G., Clutton-Brock, T. & Ozgul, A. Life history responses of meerkats to  
593 seasonal changes in extreme environments. *Science* **363**, 631–635 (2019).

594 70. Díaz, S. *et al.* The global spectrum of plant form and function. *Nature* **529**, 167–171 (2016).

595 71. Caswell, H. *Matrix population models*. vol. 1 (2000).

596 72. Frobenius, G., Frobenius, F. G., Frobenius, F. G., Frobenius, F. G. & Mathematician, G. Über  
597 Matrizen aus nicht negativen Elementen. (1912).

598 73. Perron, O. Zur Theorie der Matrices. *Math. Ann.* **64**, 248–263 (1907).

599 74. Bienvenu, F. & Legendre, S. A New Approach to the Generation Time in Matrix Population  
600 Models. *Am. Nat.* **185**, 834–843 (2015).

601 75. R Core Team. *R: A Language and Environment for Statistical Computing*. (R Foundation for  
602 Statistical Computing, 2021).

603 76. Gaillard, J. -M. *et al.* Generation Time: A Reliable Metric to Measure Life-History Variation among  
604 Mammalian Populations. *Am. Nat.* **166**, 119–123 (2005).

605 77. Oli, M. K. & Dobson, F. S. The Relative Importance of Life-History Variables to Population Growth  
606 Rate in Mammals: Cole’s Prediction Revisited. *Am. Nat.* **161**, 422–440 (2003).

607 78. Legendre, P. Spatial Autocorrelation: Trouble or New Paradigm? *Ecology* **74**, 1659–1673 (1993).

608 79. Soler, J. J., Martín-Gálvez, D., Neve, L. de & Soler, M. Brood parasitism correlates with the  
609 strength of spatial autocorrelation of life history and defensive traits in Magpies. *Ecology* **94**,  
610 1338–1346 (2013).

611 80. Kumar, S., Stecher, G., Suleski, M. & Hedges, S. B. TimeTree: A Resource for Timelines, Timetrees,  
612 and Divergence Times. *Mol. Biol. Evol.* **34**, 1812–1819 (2017).

613 81. Jin, Y. & Qian, H. V. Phylomaker: an R package that can generate very large phylogenies for  
614 vascular plants. *Ecography* **42**, 1353–1359 (2019).

615 82. Zhang, L., Gove, J. H. & Heath, L. S. Spatial residual analysis of six modeling techniques. *Ecol.*  
616 *Model.* **186**, 154–177 (2005).

617 83. Wood, S. N. & Augustin, N. H. GAMs with integrated model selection using penalized regression  
618 splines and applications to environmental modelling. *Ecol. Model.* **157**, 157–177 (2002).

619 84. Zuur, A. F. *A beginner's guide to generalized additive models with R*. (Highland Statistics Limited  
620 Newburgh, NY, 2012).

621

622

623

624

625

626

627 **Figure 1**

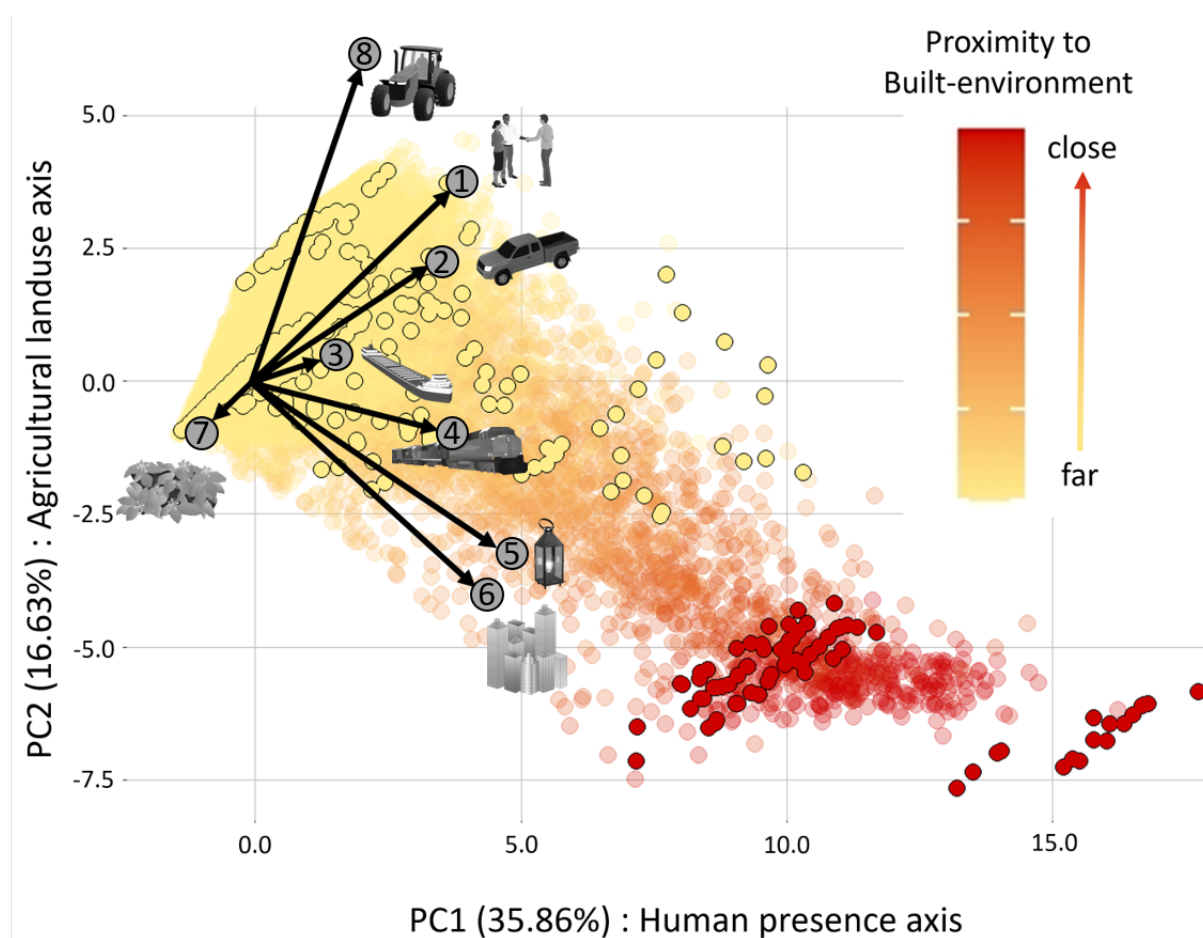

628

629 **Figure 1.** Principal Component Analysis (PCA) plot of terrestrial habitats worldwide, derived  
630 from the Human Footprint<sup>40</sup>. The PCA shows the two dominant axes of variation: PC1  
631 corresponds to variation on human presence, and it is positively correlated with (1) human  
632 population density, (2) roads, (3) navigable waterways, (4) railways, and (5) light pollutions,  
633 (6) built environment, and it explains 35.86% of variation. PC2 differentiates locations  
634 according to land use, and it represents a trade-off between (7) extensive pastures, and (8)  
635 intense croplands, and it explains 16.63% of variation. Each dot corresponds to a terrestrial unit  
636 of 10 km<sup>2</sup> and is colour-coded according to its distance to a human-built environment, here  
637 defined as human produced areas that provide the setting for human activity (delimited using  
638 satellite imagery)<sup>40</sup>. Dots with a black circle correspond to our examined 921 natural

639 populations, showing the extensive coverage of our examined sites across pristine and human-  
640 transformed habitats.

641

642 **Figure 2**

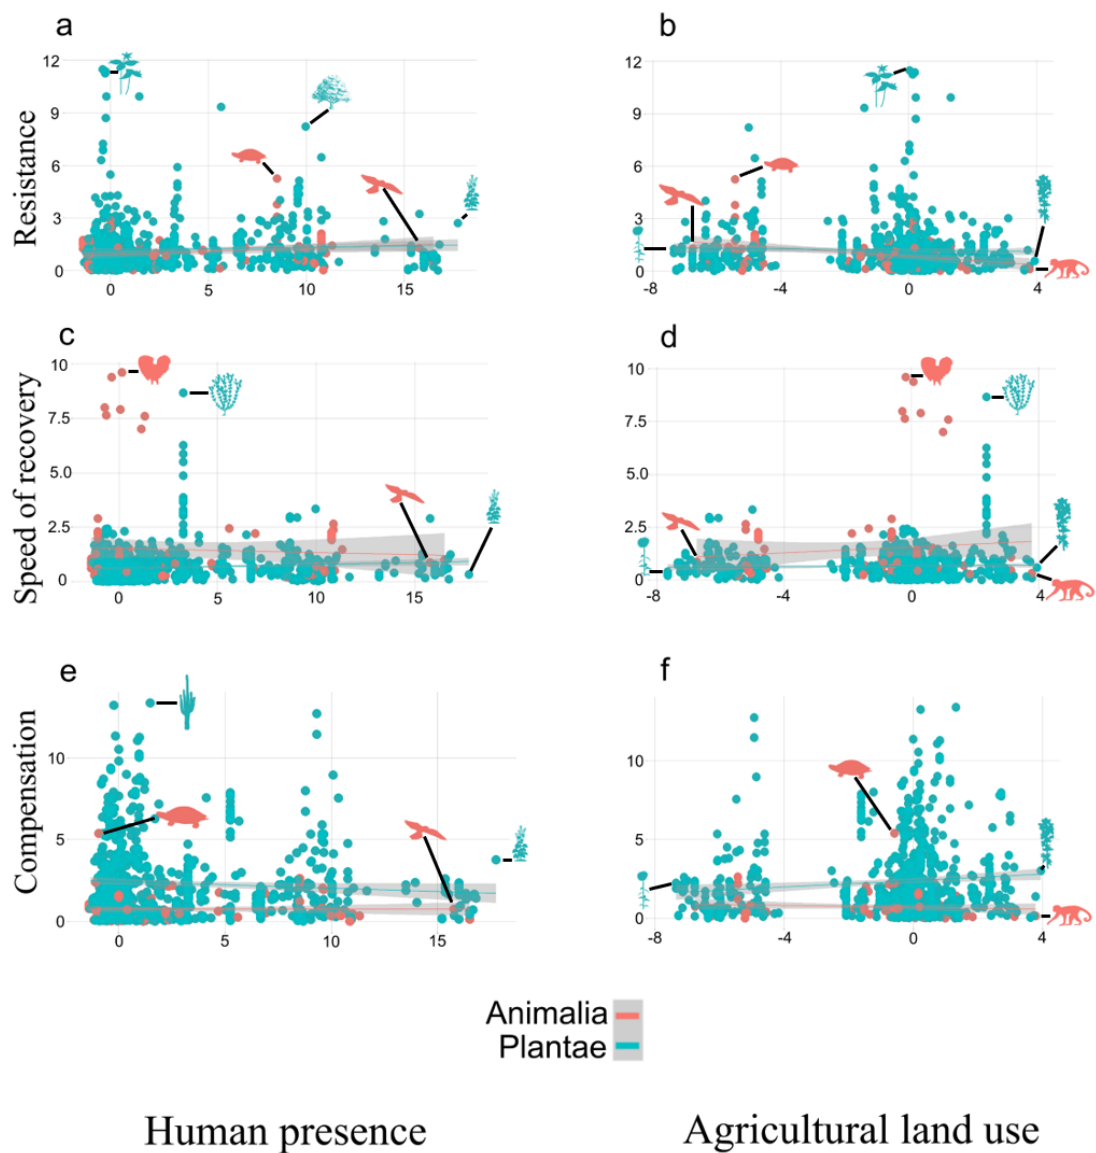

643

644 **Figure 2.** The examined components of demographic resilience correlate differently with  
645 human pressures on plants and animals. Correlation of three demographic resilience  
646 components (resistance, speed of recovery, and compensation) of our studied 921 natural  
647 populations along the continua of human presence (a, c, e) and agricultural land use (b, d, f)  
648 (See Figure 1). The shown linear fit describes the general correlations (orange: animals; green:  
649 plants), with the grey area representing 95% confidence intervals. A selected number of species  
650 are represented by silhouettes, from left to right: (a) *Trillium persistens* (persistent trillium),

651 *Emydura macquarii* (Macquarie turtle), *Cornus florida* (flowering dogwood), *Falco naumanni*  
652 (lesser kestrel), *Alliaria petiolata* (garlic mustard); (b) *Echinacea angustifolia* (narrow-leaved  
653 purple coneflower), *Falco naumanni*, *Emydura macquarii*, *Trillium persistens*, *Dracocephalum*  
654 *austriacum* (Austrian dragon's head), *Cebus capucinus* (Colombian white-face capuchin); (c)  
655 *Bonasa umbellus* (ruffed grouse), *Arenaria serpyllifolia* (thyme-leaf sandwort), *Falco*  
656 *naumanni*, *Alliaria petiolata*; (d) *Echinacea angustifolia*, *Falco naumanni*, *Bonasa umbellus*,  
657 *Arenaria serpyllifolia*, *Dracocephalum austriacum*, *Cebus capucinus*; (e) *Podocnemis expansa*  
658 (Arrau turtle), *Pseudomicrocereus fulviceps*, *Falco naumanni* ; (f) *Echinacea angustifolia*,  
659 *Podocnemis expansa*, *Dracocephalum austriacum*, *Cebus capucinus*.

660

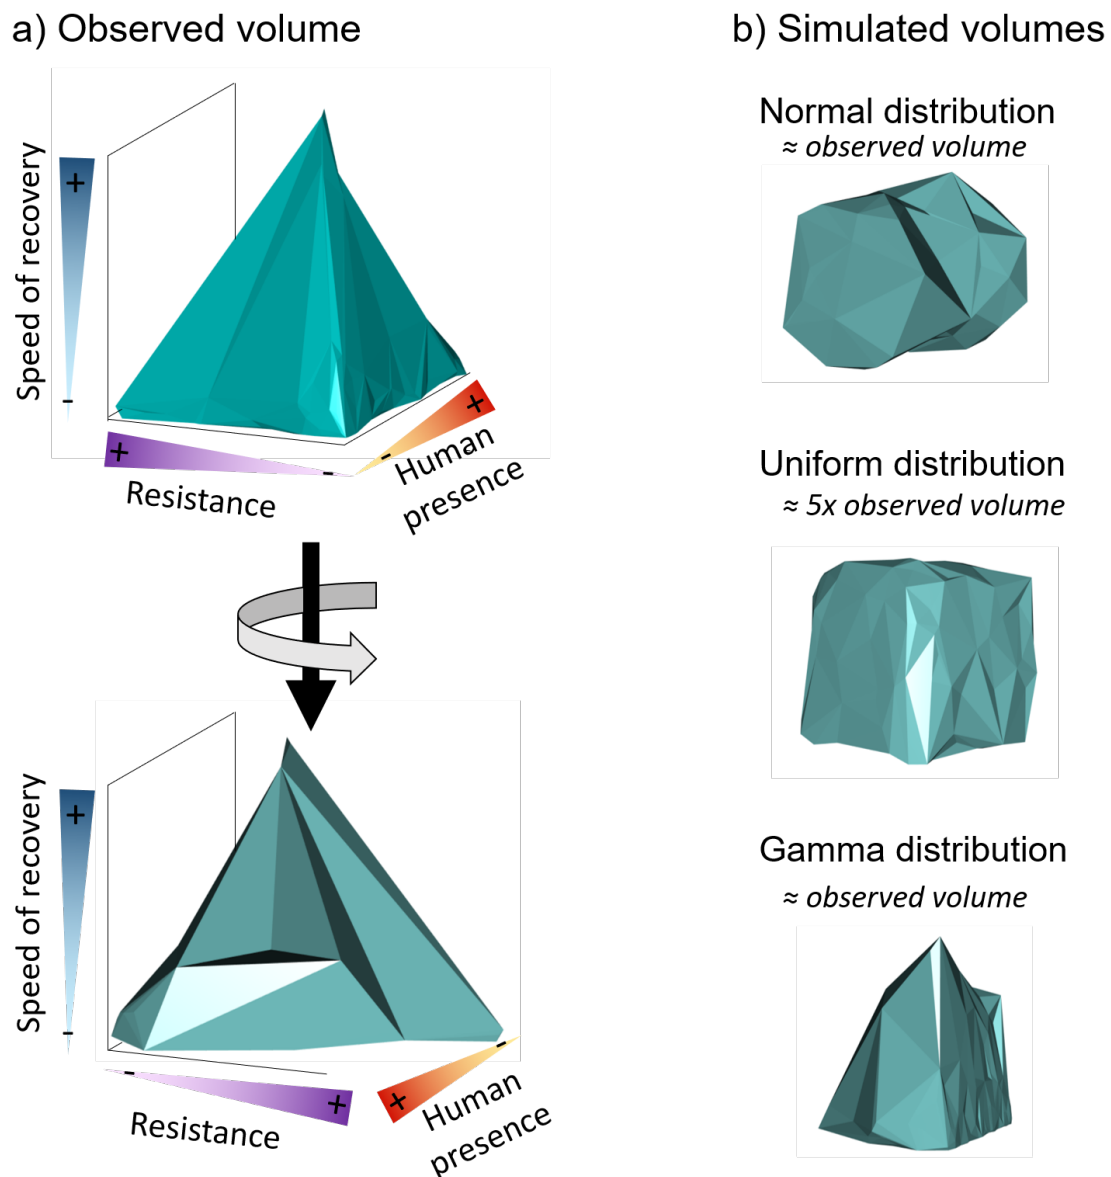

662

663 **Figure 3.** Human presence tightened the repertoire of resilience strategies. a) Plot of the 3D  
 664 framework composed of human presence, recovery time and resistance (compensation is not  
 665 displayed here for visual convenience). b) Comparisons of the volume of achieved strategies  
 666 in the space defined by compensation – resistance –recovery time – human presence under the  
 667 hypothesis of a normal distribution of the resistance and speed of recovery, a uniform  
 668 distribution of the three same traits and the observed distributions in our populations (for  
 669 graphical reason only 3D framework without compensation are displayed).



670 **Figure 4**

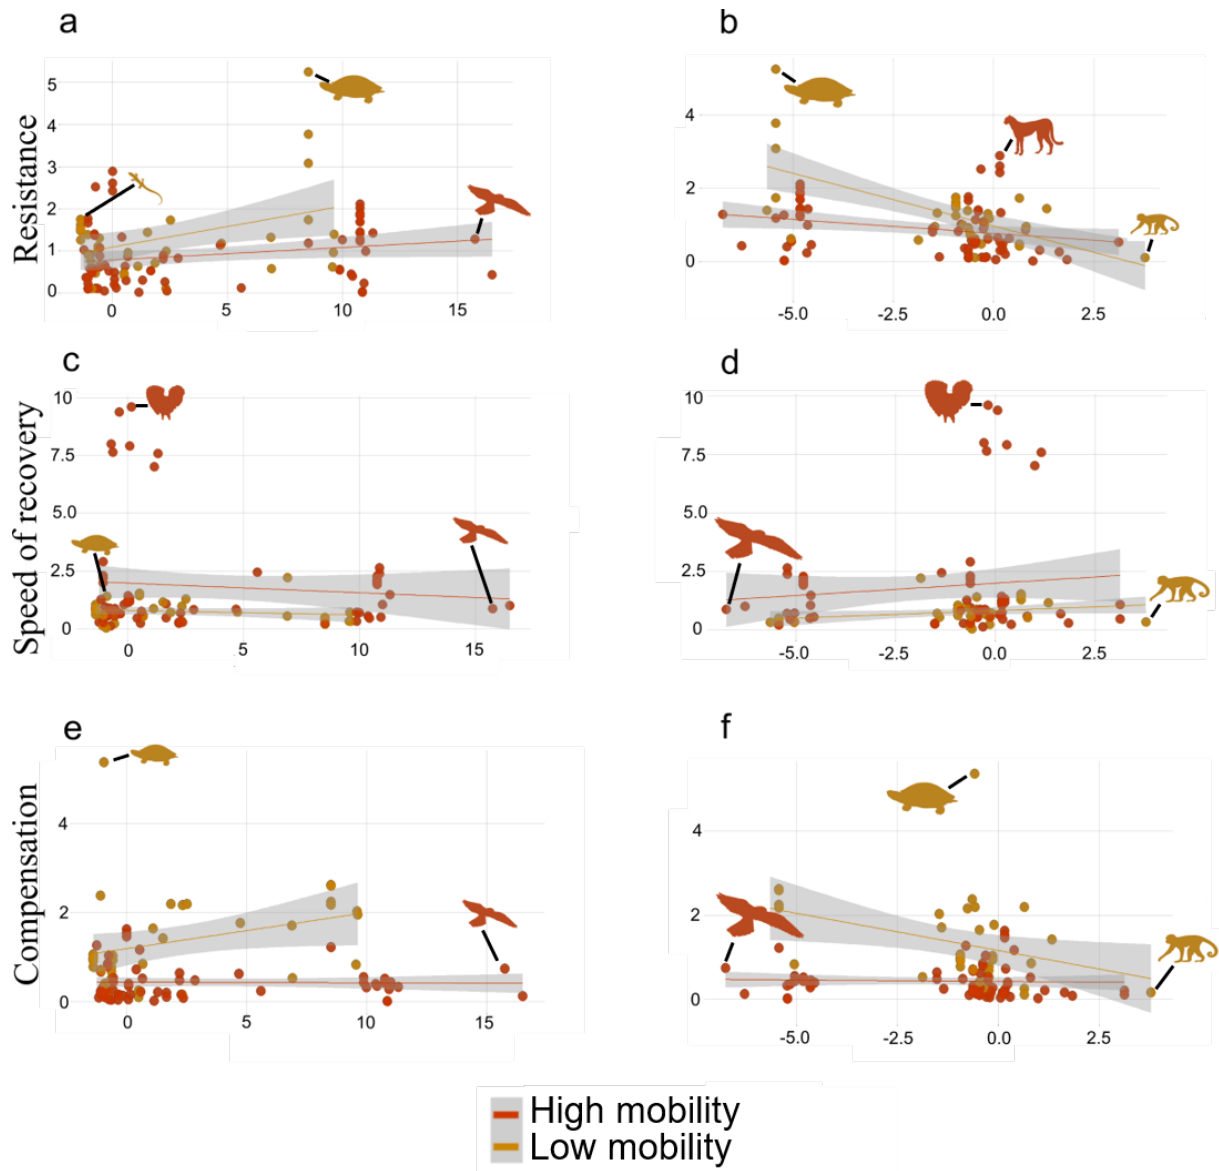

671 Human presence Agricultural land use

672 **Figure 4.** Low mobility species' demographic resilience is more strongly affected by human

673 pressures than high mobility species. Correlation of three key demographic resilience

674 components (resistance, speed of recovery, and compensation) of our studied 109 natural

675 populations along the continua of human presence (a, c, e) and agricultural land use (b, d, f)

676 (See Figure 1). The shown linear fit describes the correlations (brown: high mobility migration

677 [ $>100$  km]; yellow: low mobility), with the grey area representing 95% confidence intervals. A

678 selected number of species are represented by silhouettes, from left to right: (a) *Sceloporus*  
679 *arenicolus* (dune sagebrush lizard), *Emydura macquarii*, *Falco naumanni*; (b) *Emydura*  
680 *macquarii*, *Acinonyx jubatus* (cheetah), *Cebus capucinus*; (c) *Podocnemis expansa*, *Bonasa*  
681 *umbellus*, *Falco naumanni*; (d) *Falco naumanni*, *Bonasa umbellus*, *Cebus capucinus*; (e)  
682 *Podocnemis expansa*, *Falco naumanni* f) *Falco naumanni*, *Podocnemis expansa*, *Cebus*  
683 *capucinus*.

684

685 **Table 1**

| Residual method for <b>plants</b> and <b>animals</b> |                              |                              |                 |                    |
|------------------------------------------------------|------------------------------|------------------------------|-----------------|--------------------|
| Trait                                                | Human presence axis          | Agricultural land-use        | Size correction | Spatial correction |
| a) Vital rates                                       |                              |                              |                 |                    |
| Survival                                             | 0.00 (0.03)<br>-0.01 (0.25)  | 0.00 (0.89)<br>-0.03 (0.15)  | NO<br>YES       | YES<br>NO          |
| Growth                                               | 0.00 (0.72)<br>0.00 (0.64)   | 0.00 (0.66)<br>0.01 (0.61)   | YES<br>YES      | YES<br>YES         |
| Shrinkage                                            | 0.01 (0.33)<br>-             | 0.01 (0.78)<br>-             | YES<br>-        | YES<br>-           |
| Sexual reproduction                                  | -0.04 (0.14)<br>-0.00 (0.65) | 0.04 (0.30)<br>0.00 (0.98)   | YES<br>YES      | YES<br>NO          |
| Clonal reproduction                                  | -0.01 (0.31)<br>-            | -0.02 (0.21)<br>-            | NO<br>-         | YES<br>-           |
| Shrinkage of pre-reproductive stages                 | 0.01 (0.01)<br>-             | 0.01 (0.06)<br>-             | NO<br>-         | YES<br>-           |
| Survival of reproductive stages                      | 0.00 (0.86)<br>0.00 (0.60)   | 0.00 (0.81)<br>-0.01 (0.73)  | NO<br>YES       | YES<br>YES         |
| Growth of reproductive stages                        | 0.01 (0.20)<br>0.00 (0.70)   | 0.01 (0.09)<br>-0.03 (0.29)  | YES<br>YES      | YES<br>YES         |
| b) Life history traits                               |                              |                              |                 |                    |
| Net reproductive rate                                | 0.03 (0.36)<br>0.06 (0.25)   | 0.04 (0.48)<br>0.13 (0.23)   | YES<br>NO       | YES<br>NO          |
| Degree of iteroparity                                | -0.04 (0.30)<br>0.00 (0.96)  | -0.05 (0.40)<br>0.01 (0.95)  | NO<br>YES       | YES<br>NO          |
| Generation time                                      | 0.00 (0.94)<br>0.28 (0.08)   | -0.01 (0.65)<br>0.51 (0.17)  | YES<br>YES      | YES<br>NO          |
| Age at first reproduction                            | -0.02 (0.13)<br>0.01 (0.69)  | -0.01 (0.72)<br>-0.02 (0.81) | YES<br>YES      | YES<br>YES         |
| Rate of actuarial senescence                         | 0.00 (0.49)<br>-0.01 (0.37)  | 0.01 (0.29)<br>-0.01 (0.81)  | YES<br>YES      | YES<br>NO          |
| Probability of achieving maturity before dying       | 0.01 (0.17)<br>0.00 (0.88)   | 0.00 (0.72)<br>0.02 (0.42)   | YES<br>NO       | YES<br>YES         |

686

687 **Table 1.** The effects of human pressure are restricted to only a few demographic traits.

688 Summary of the results of the trait analysis for plants (light blue) and animals (light red) using

689 the residual method (i.e., the spatially and phylogenetically explicit method) described in  
690 Methods. The human presence axis and agricultural land-use axis refer to the two main  
691 dimensions of human activities from the Human Footprint database<sup>40</sup>, as detailed in Figure 1.  
692 The columns “size correction” and “spatial correction” indicate whether we applied such  
693 corrections in the model (See Materials and Methods for further details on model choice). Note  
694 that none of the examined animal populations include shrinkage or clonal reproduction (thus “-  
695 “).  $P_{MCMC}$ -values parentheses with underline:  $P_{MCMC} < 0.05$ ; bold:  $P_{MCMC} < 0.001$ .

696
